# Supplementary material for: Multi-Scale Comparison of Physicochemical Properties, Refined Structures, and Gel Characteristics of a Novel Native Wild Pea Starch with Commercial Pea and Mung Bean Starch
Source: MDPI journal article supplement (doi:10.3390/foods12132513), 2023-06-28
Supplement: s1 [file s1]

Table S1. Slopes (Pa·s) and intercepts (Pa) of  $\ln(G')$ ,  $G''$  versus  $\ln$  Frequency (Hz) data of three starch paste at 25 °C.

| Samples      | $G'$              |                   |       | $G''$             |                   |       |
|--------------|-------------------|-------------------|-------|-------------------|-------------------|-------|
|              | Slope             | Intercept         | $R^2$ | Slope             | Intercept         | $R^2$ |
| Common vetch | $0.092 \pm 0.001$ | $3.078 \pm 0.006$ | 0.99  | $0.391 \pm 0.019$ | $1.943 \pm 0.014$ | 0.98  |
| Mung bean    | $0.136 \pm 0.003$ | $3.170 \pm 0.004$ | 0.99  | $0.295 \pm 0.020$ | $2.022 \pm 0.006$ | 0.96  |
| Pea          | $0.099 \pm 0.001$ | $2.909 \pm 0.008$ | 0.99  | $0.215 \pm 0.003$ | $1.971 \pm 0.002$ | 0.99  |

Mean values  $\pm$  standard deviation of triplicates
